# Supplementary material for: A novel 2-DOF planar translational mechanism composed by scissor-like elements
Source: Copernicus journal article supplement (doi:10.5194/ms-8-179-2017), 2017-06-22
Supplement: Supplementary file 1 [file List of videos.docx]

List of videos

1. Docking simulation.

In this video, the docking procedure is simulated, and the curves of the actuator force and the *x*-axis displacement of the platform are presented.

2. Mobility simulation

In this video, a random force is added to the platform, which results in the movement of the platform. The motion shows the platform has 2 pure translational degrees of freedom.
