# Supplementary material for: A novel 2-DOF planar translational mechanism composed by scissor-like elements
Source: Copernicus journal article supplement (doi:10.5194/ms-8-179-2017), 2017-06-22
Supplement: Supplementary file 1 [file ms-8-179-2017-supplement.zip]

Archive with 4 entries (4 files):
- List of videos.docx
- ms-8-179-2017-supplement-title-page.pdf
- Docking simulation.avi
- Mobility simulation.avi
