# Supplementary material for: A novel 2-DOF planar translational mechanism composed by scissor-like elements
Source: Copernicus journal article supplement (doi:10.5194/ms-8-179-2017), 2017-06-22
Supplement: Supplementary file 1 [file ms-8-179-2017-supplement.zip › ms-8-179-2017-supplement-title-page.pdf]

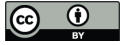

## *Supplement of*

# **A novel 2-DOF planar translational mechanism composed by scissor-like elements**

**Yi Yang et al.**

*Correspondence to:* Yan Peng ([pengyan@shu.edu.cn](mailto:pengyan@shu.edu.cn))

- [ms-8-179-2017-supplement-title-page.pdf](#)
- [Docking simulation.avi](#)
- [List of videos.docx](#)
- [Mobility simulation.avi](#)

The copyright of individual parts of the supplement might differ from the CC BY 3.0 License.
